# Supplementary material for: Identification of Key Genes for the Precise Classification between Solenopsis invicta and S. geminata Facilitating the Quarantine Process
Source: MDPI journal article supplement (doi:10.3390/genes10100812), 2019-10-15
Supplement: s1 [file s1]

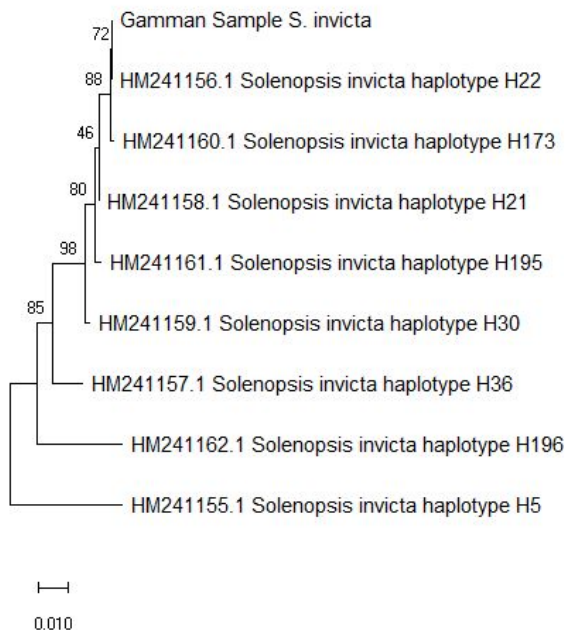

**Supplementary Figure 1.** COX1 haplotyping to determine the origin of *S. invicta* sampled at Gamman pier. The tree is drawn to scale, with the branch lengths from the number of substitutions per site.
